# Supplementary material
Source: Springer Nature journal article supplement (https://www.springermedizin.de/resource/supplementary/12936_2010_1388_MOESM3_ESM.pdf/9549678)
Supplement: MOESM3 [file 9549678]

## Phase 1

Sept-Oct 2008

**Coast Survey**  
65 schools

*Malaria diagnosis*

OptiMal RDTs and blood slides

*Other indicators*

Anaemia  
ITN use

Feb-Mar 2009

**Tana River Survey**  
54 schools

OptiMal / Paracheck *Pf* dipstick RDTs and blood slides

Anaemia  
ITN use

## Phase 2

Jul-Nov 2009

**Phase 2a survey**  
267 schools

Paracheck *Pf* device RDTs and blood slides

Anaemia  
ITN use

Jan-Mar 2010

**Phase 2b survey**  
94 schools

CareStart *Pf/Pv* RDTs and blood slides

Anaemia  
ITN use
